# Supplementary material for: Silver oxide nanocrystals anchored on titanate nanotubes and nanofibers: promising candidates for entrapment of radioactive iodine anions
Source: Royal Society of Chemistry journal article supplement (doi:10.1039/c3nr02412a), 2013-01-01
Supplement: c3nr02412a.pdf [file c3nr02412a.pdf]

## Supporting Information for

### Silver Oxide Nanocrystals Anchored on Titanate Nanotubes and Nanofibers: Promising Candidates for Entrapment of Radioactive Iodine Anions

Dongjiang Yang<sup>a,b,\*</sup>, Hongwei Liu<sup>c</sup>, Long Liu<sup>a</sup>, Sarina Sarina<sup>b</sup>, Zhanfeng Zheng<sup>b</sup>, and Huaiyong Zhu<sup>b,\*</sup>

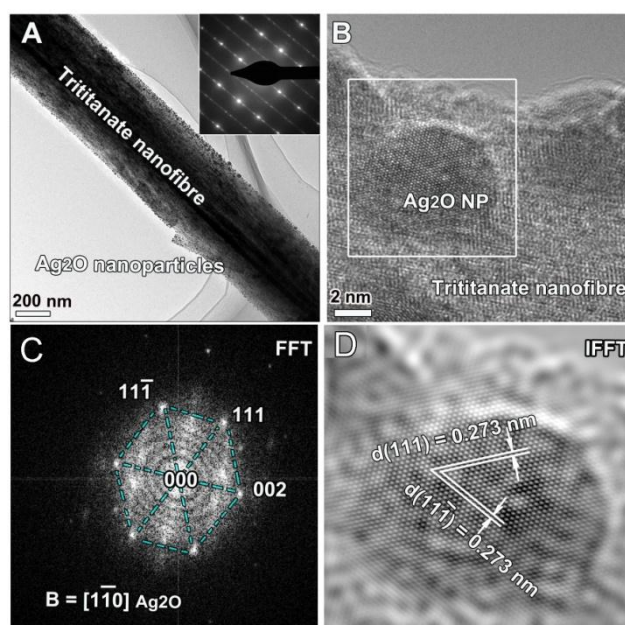

**Figure S1.** Ag<sub>2</sub>O nanocrystals coated sodium trititanate nanofibers (Ag<sub>2</sub>O-T3NF). (A) TEM analysis of the Ag<sub>2</sub>O nanocrystals coated on the titanate nanofibers. Inset: selected-area electron diffraction pattern (EDP) of the nanofibers. (B) A HRTEM image of an Ag<sub>2</sub>O nanoparticle. (C) Fast fourier transition (FFT) image of the selected area in image B. (D) An image obtained by inverting the fast fourier transition (IFFT) image of the selected area in image B.

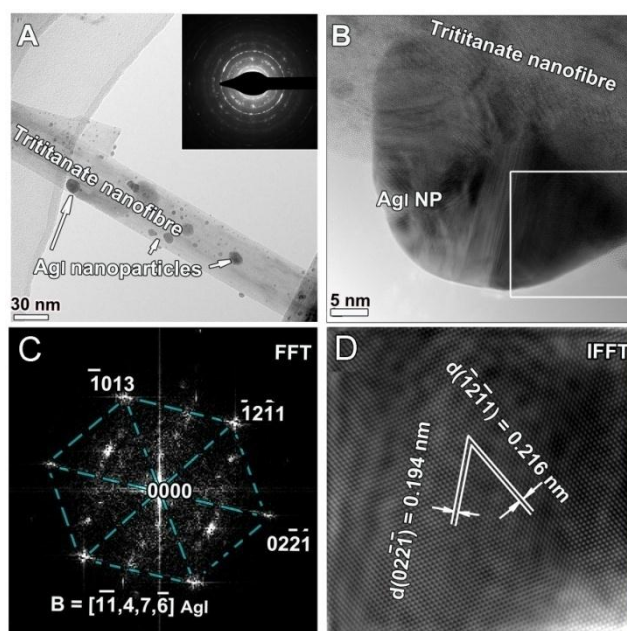

**Figure S2.** AgI nanocrystals coated sodium trititanate nanofibers ( $\text{Ag}_2\text{O-T3NF}$ ). (A) TEM analysis of the AgI nanocrystals coated on the titanate nanofibers. Inset: selected-area electron diffraction pattern (EDP) of the nanofibers. (B) A HRTEM image of an AgI nanoparticle. (C) Fast fourier transition (FFT) image of the selected area in image B. (D) An image obtained by inverting the fast fourier transition (IFFT) image of the selected area in image B.
